# Supplementary material for: Variants in myelin regulatory factor (MYRF) cause autosomal dominant and syndromic nanophthalmos in humans and retinal degeneration in mice
Source: PubMed Central journal article supplement (PMC6527243; doi:10.1371/journal.pgen.1008130), 2019-05-02
Supplement: pgen.1008130.s012.pdf [file pgen.1008130.s012.pdf]

**Table S1:** Pooled exome candidate variants for the NNO1 linkage region

| Chr 11 position | Gene    | Mutation type   | Nucleotide Δ | Protein Δ           | CADD score | Cons | gnomAD allele freq                 |
|-----------------|---------|-----------------|--------------|---------------------|------------|------|------------------------------------|
| 61553534        | MYRF    | splice acceptor | c.3376-1 G>A | p.Gly1126>Val fs*31 | 32         | High | 0/246126                           |
| 61253294        | PPP1R32 | missense        | c.154 G>A    | p.Gly200>Ser        | 19.01      | High | 0.24% (669/277018, 10 homozygotes) |
| 60637010        | ZP1     | missense        | c.319 G>A    | p.Asn107>Asp        | 23.1       | High | 0.2% (629/268740, 4 homozygotes)   |

Chr 11, chromosome 11; Nucleotide Δ, nucleotide change (cDNA nucleotide change from longest transcript); Protein Δ, predicted protein change; CADD score, combined annotation dependent depletion score (using CADD GRCh37-v1.4); Cons, 100 vertebrate conservation based on UCSC genome browser evaluation; gnomAD allele freq, Allele frequency in gnomAD database with number of alleles and number of homozygotes in parantheses)
