# Supplementary material for: Variants in myelin regulatory factor (MYRF) cause autosomal dominant and syndromic nanophthalmos in humans and retinal degeneration in mice
Source: PubMed Central journal article supplement (PMC6527243; doi:10.1371/journal.pgen.1008130), 2019-05-02
Supplement: pgen.1008130.s013.pdf [file pgen.1008130.s013.pdf]

**Table S2:** MYRF variants in nanophthalmos/high hyperopia probands

| SNP ID     | Position chr 11 | Allele | MYRF Protein change* | SIFT      | Conservation <sup>§</sup> | CADD score | gnomAD # alleles (%) | Cohort freq # alleles (%) |
|------------|-----------------|--------|----------------------|-----------|---------------------------|------------|----------------------|---------------------------|
| rs149803   | 61539020        | C/G    | p.Pro263=            | N/A       | Moderate                  | 19.93      | G=51286 (18.2)       | 35 (29)                   |
| rs75158668 | 61545842        | C/T    | Intron Variant       | N/A       | Low                       | 6.652      | T=3726 (1.3)         | 1 (0.8)                   |
| rs61747222 | 61548796        | G/A    | p.Arg920His          | Tolerated | Low                       | 13.65      | A=6546 (2.3)         | 6 (5)                     |
| rs174535   | 61551356        | T/C    | p.Ser1051=           | N/A       | Moderate                  | 12.79      | C=102262 (37.5)      | 30 (25)                   |

SNP ID, Single nucleotide polymorphism ID; \* MYRF protein consequence from NM\_001127392.2 transcript; SIFT, sorting intolerant from tolerant prediction; § Conservation based on UCSC genome 100 species PhyloP; CADD score, combined annotation dependent depletion score (using CADD GRCh37-v1.4); gnomAD # allele (%), gnomAD allele freq, minor allele number in gnomAD database with allele frequency in parantheses.
