# Supplementary material for: Variants in myelin regulatory factor (MYRF) cause autosomal dominant and syndromic nanophthalmos in humans and retinal degeneration in mice
Source: PubMed Central journal article supplement (PMC6527243; doi:10.1371/journal.pgen.1008130), 2019-05-02
Supplement: pgen.1008130.s014.pdf [file pgen.1008130.s014.pdf]

**Table S3:** MYRF variants in examined individuals in The Genome Ascertainment Cohort (TGAC)

| Transcript consequence*       | SNP ID      | MYRF Protein change                   | SIFT     | Conservation <sup>§</sup> | CADD score | gnomAD # alleles / % | Axial length (mm) <sup>#</sup> |
|-------------------------------|-------------|---------------------------------------|----------|---------------------------|------------|----------------------|--------------------------------|
| c.989C>G                      | N/A         | p.Pro330Arg                           | Damaging | High                      | 24.7       | G=1 (0.0004%)        | 23.3 / 23.3                    |
| c.880_898del<br>insCTCGAGAGAG | N/A         | p.Ser294_Gln300del<br>insLeuGluArgGlu | N/A      | High                      | N/A        | N/A                  | 24.2 / 24.1                    |
| c.2338G>A                     | rs201384645 | p.Val780Met                           | Damaging | High                      | 34         | A=111 (0.04%)        | 22.82 / 22.67                  |

\* MYRF transcript consequence from NM\_001127392.2; SNP ID, Single nucleotide polymorphism ID; SIFT, sorting intolerant from tolerant prediction; § Conservation based on UCSC genome 100 species PhyloP; CADD score, combined annotation dependent depletion score (using CADD GRCh37-v1.4); gnomAD # allele/ %, gnomAD allele freq, minor allele number in gnomAD database with allele frequency in parantheses. #, Axial length in right and left eye.
