# Supplementary material for: Variants in myelin regulatory factor (MYRF) cause autosomal dominant and syndromic nanophthalmos in humans and retinal degeneration in mice
Source: PubMed Central journal article supplement (PMC6527243; doi:10.1371/journal.pgen.1008130), 2019-05-02
Supplement: pgen.1008130.s015.pdf [file pgen.1008130.s015.pdf]

**Table S4:** Cell count data from *Myrf* conditional knockout mice.

| Genotype                                                      |      | Total area <sup>a</sup><br>(mm <sup>2</sup> ) | ONL % of<br>Total Area                  | INL / Total<br>Area (%)       | GCL / Total Area<br>(%)          | OS/IS / Total<br>Area (%) | Thickness ONL<br>(µm)          | Thickness<br>INL (µm) |
|---------------------------------------------------------------|------|-----------------------------------------------|-----------------------------------------|-------------------------------|----------------------------------|---------------------------|--------------------------------|-----------------------|
| Control<br>n=6 anim, 8 eyes, 26 sec                           | Mean | 2.5                                           | 24                                      | 21                            | 19                               | 21                        | 93                             | 85                    |
|                                                               | SD   | 0.2                                           | 3                                       | 1                             | 2                                | 3                         | 20                             | 30                    |
| <i>Rxcre;Myrf<sup>fl/fl</sup></i><br>n=3 anim, 6 eyes, 14 sec | Mean | 2.4                                           | 23                                      | 18**                          | 20                               | 21                        | 81                             | 67                    |
|                                                               | SD   | 0.3                                           | 2                                       | 1                             | 2                                | 1                         | 10                             | 10                    |
| <i>Rxcre;Myrf<sup>fl/fl</sup></i><br>n=4 anim, 4 eyes, 15 sec | Mean | 1.9***                                        | 20*                                     | 16**                          | 18                               | 12***                     | 61**                           | 50**                  |
|                                                               | SD   | 0.1                                           | 2                                       | 1                             | 1                                | 2                         | 10                             | 2                     |
| Genotype                                                      |      | # cells in<br>ONL                             | # cells in<br>INL                       | # cells in<br>GCL             | # Cones / Total<br>Retinal Cells | %Cones /<br>Cells ONL     | #Rods / Total<br>Retinal Cells | % Rods /<br>Cells ONL |
| Control                                                       | Mean | 2337                                          | 737                                     | 123                           | 109                              | 5                         | 2227                           | 95                    |
|                                                               | SD   | 446                                           | 95                                      | 12                            | 23                               | 1                         | 438                            | 1                     |
| <i>Rxcre;Myrf<sup>fl/fl</sup></i>                             | Mean | 2708                                          | 658                                     | 126                           | 112                              | 4                         | 2509                           | 96                    |
|                                                               | SD   | 33                                            | 111                                     | 37                            | 12                               | 0.5                       | 212                            | 0.5                   |
| <i>Rxcre;Myrf<sup>fl/fl</sup></i>                             | Mean | 1708**                                        | 618*                                    | 120                           | 55***                            | 3*                        | 1654*                          | 97*                   |
|                                                               | SD   | 227                                           | 54                                      | 3                             | 11                               | 1                         | 216                            | 1                     |
| Genotype                                                      |      | ONL<br>#cells/mm <sup>2</sup><br>retina       | INL<br>#cells/mm <sup>2</sup><br>retina | GCL<br>#cells/mm <sup>2</sup> |                                  |                           |                                |                       |
| Control                                                       | Mean | 4805                                          | 1746                                    | 327                           |                                  |                           |                                |                       |
|                                                               | SD   | 650                                           | 104                                     | 56                            |                                  |                           |                                |                       |
| <i>Rxcre;Myrf<sup>fl/fl</sup></i>                             | Mean | 6152**                                        | 1966**                                  | 350                           |                                  |                           |                                |                       |
|                                                               | SD   | 813                                           | 136                                     | 88                            |                                  |                           |                                |                       |
| <i>Rxcre;Myrf<sup>fl/fl</sup></i>                             | Mean | 4993                                          | 2259**                                  | 386                           |                                  |                           |                                |                       |
|                                                               | SD   | 198                                           | 137                                     | 32                            |                                  |                           |                                |                       |

<sup>a</sup>Total area refers to total retinal area on the section, including only areas that contain all retinal layers and excluding IS/OS area

<sup>b</sup>ONL-Outer nuclear layer

<sup>c</sup>INL-Inner nuclear layer

<sup>d</sup>GCL-ganglion cell layer

<sup>e</sup>OS/IS-Outer segment plus Inner segment

SD, standard deviation; anim, animals; sec, sections

\*\*\* p<0.001, \*\* p<0.01, \* p<0.05 for two-tailed t-test comparison with control
