# Supplementary material for: Variants in myelin regulatory factor (MYRF) cause autosomal dominant and syndromic nanophthalmos in humans and retinal degeneration in mice
Source: PubMed Central journal article supplement (PMC6527243; doi:10.1371/journal.pgen.1008130), 2019-05-02
Supplement: pgen.1008130.s016.pdf [file pgen.1008130.s016.pdf]

**S5 Table:** Electrophysiology data on *Myrf* conditional knockout mice.

| Conditions             | Stimulus intensity       |                    | Control, n= 4 eyes |       | <i>Rxcre;Myrf<sup>fl/fl</sup></i> , n=4 eyes |       | p value    | <i>Rxcre;Myrf<sup>fl/fl</sup></i> , n=12 eyes |       | p value    |                        |
|------------------------|--------------------------|--------------------|--------------------|-------|----------------------------------------------|-------|------------|-----------------------------------------------|-------|------------|------------------------|
|                        |                          |                    | Mean               | SD    | Mean                                         | SD    | wt vs. het | Mean                                          | SD    | wt vs. mut |                        |
| SCOTOPIC               | 0.01 cd*s/m <sup>2</sup> | B                  | Amplitude (μV)     | 80    | 14                                           | 80    | 23         | 0.98                                          | 51    | 25         | 0.02*                  |
|                        |                          |                    | Implicit time (ms) | 81    | 1                                            | 87    | 2          |                                               | 85    | 4          |                        |
|                        | 10 cd*s/m <sup>2</sup>   | a                  | Amplitude (μV)     | -89   | 22                                           | -102  | 15         | 0.38                                          | -43   | 13         | 0.02*                  |
|                        |                          |                    | Implicit time (ms) | 9     | 0                                            | 8     | 0          |                                               | 9     | 3          |                        |
|                        |                          | B                  | Amplitude (μV)     | 134   | 22                                           | 154   | 31         | 0.35                                          | 80    | 31         | 0.006**                |
|                        |                          |                    | Implicit time (ms) | 76    | 2                                            | 77    | 2          |                                               | 78    | 4          |                        |
| 32 cd*s/m <sup>2</sup> | a                        | Amplitude (μV)     | -106               | 26    | -122                                         | 16    | 0.35       | -48                                           | 13    | 0.02*      |                        |
|                        |                          | Implicit time (ms) | 6.9                | 0.2   | 6.9                                          | 0.3   |            | 6.9                                           | 0.4   |            |                        |
|                        | B                        | Amplitude (μV)     | 151                | 33    | 177                                          | 33    | 0.31       | 83                                            | 32    | 0.02*      |                        |
|                        |                          | Implicit time (ms) | 71                 | 3     | 74                                           | 1     |            | 76                                            | 4     |            |                        |
| PHOTOPIC               | 10 cd*s/m <sup>2</sup>   | B                  | Amplitude (μV)     | 48    | 3                                            | 54    | 4          | 0.04*                                         | 20    | 9          | 3x10 <sup>-7</sup> *** |
|                        |                          |                    | Implicit time (ms) | 40    | 2                                            | 39    | 1          |                                               | 46    | 4          |                        |
|                        | 32 cd*s/m <sup>2</sup>   | B                  | Amplitude (μV)     | 52    | 5                                            | 56    | 4          | 0.38                                          | 23    | 9          | 9x10 <sup>-6</sup> *** |
|                        |                          |                    | Implicit time (ms) | 39    | 2                                            | 38    | 1          |                                               | 44    | 4          |                        |
|                        | 100 cd*s/m <sup>2</sup>  | B                  | Amplitude (μV)     | 53    | 7                                            | 59    | 6          | 0.23                                          | 25    | 9          | 0.0004***              |
|                        |                          |                    | Implicit time (ms) | 39    | 2                                            | 38    | 1          |                                               | 43    | 3          |                        |
| FLICKER                | 20 cd*s/m <sup>2</sup>   | P1                 | Amplitude (μV)     | 30.75 | 0.86                                         | 35.96 | 3.39       | 0.05                                          | 17.53 | 6.35       | 1x10 <sup>-5</sup> *** |
|                        |                          |                    | Implicit time (ms) | 49.00 | 1.73                                         | 47.13 | 0.63       |                                               | 51.5  | 2.71       |                        |

a, a-wave; B, B-wave; P1, peak flicker amplitude; SD, standard deviation; \*\*\* p<0.001; \*\* p<0.01; \* p<0.05
