# Supplementary material for: Variants in myelin regulatory factor (MYRF) cause autosomal dominant and syndromic nanophthalmos in humans and retinal degeneration in mice
Source: PubMed Central journal article supplement (PMC6527243; doi:10.1371/journal.pgen.1008130), 2019-05-02
Supplement: pgen.1008130.s017.pdf [file pgen.1008130.s017.pdf]

**Table S6: MYRF screening primers and conditions**

| Oligo Name              | Oligo Sequence        | Amplicon Size | Annealing Temp* |
|-------------------------|-----------------------|---------------|-----------------|
| MYRF Exon 1A for        | ACCGTAGCCGGAGCCCA     | 250bp         | 60              |
| MYRF Exon 1A rev        | CGGAAACACAGCGAGGAG    |               |                 |
| MYRF Exon 1B for        | GGGAAAGGGTTTTACCGAAG  | 501bp         | 55              |
| MYRF Exon 1B rev        | TGCAGGTGAGGAAAAGGAC   |               |                 |
| MYRF Exon 2/3 for       | AGACTCAAGGTGGCCTTGTG  | 1165bp        | 55              |
| MYRF Exon 2/3 rev       | GGTATGCAGGTGTTCCCATG  |               |                 |
| MYRF Exon 2 rev seq     | GGGAATCTCCATAGTTCCC   |               |                 |
| MYRF Exon 3 for seq     | GGGAATCTCCATAGTTCCC   |               |                 |
| MYRF Exon 2/3 for-2     | CTGTACCCAGATCCATGCC   | 904 bp        | 55              |
| MYRF Exon 2/3 rev-2     | TATGCCGCTGTATCCCCCTA  |               |                 |
| MYRF Exon 4 for         | TGTGACGAAACCTCAGTGTC  | 316bp         | 55              |
| MYRF Exon 4 rev         | TGACCAGCGATAATCTCAGC  |               |                 |
| MYRF Exon 5 for         | TCAGGACGGGGTGGAAACA   | 487bp         | 60              |
| MYRF Exon 5 rev         | TGCATCCCGTCCCTACCT    |               |                 |
| MYRF Exon 5 for-2       | TAGTAGGTGGCTGACCAACG  |               | 55              |
| MYRF Exon 5 rev-2       | GGCCTTCATGTACAGATCCCG |               |                 |
| MYRF Exon 6/7 for       | TGACCTTGAGTGTGACACTG  | 909bp         | 56              |
| MYRF Exon 6/7 rev       | TGTGAAATGAGTGCTCCCAG  |               |                 |
| MYRF Exon 8 for         | AGCCCTGTACTAGAATCCTC  | 452bp         | 55              |
| MYRF Exon 8 rev         | TTTCTGGGGTCTTTCAGTGC  |               |                 |
| MYRF Exon 9/10 for      | TTCCTGGTGAGCTCTAGTTG  | 772bp         | 55              |
| MYRF Exon 9/10 rev      | CTGGCCAGATGCATGTTTAT  |               |                 |
| MYRF Exon 11 for        | GACTTAAGGATGGGAAGAGC  | 572bp         | 55              |
| MYRF Exon 11 rev        | CAAGCCCAACTTGAAGTGC   |               |                 |
| MYRF Exon 11 for-2      | ACAGGCTGAGCCATTTCACA  | 621bp         | 55              |
| MYRF Exon 11 rev-2      | GCCCAACTTGAAGTGTCCCT  |               |                 |
| MYRF Exon 12/13 for     | GACAGTTCAAGTTGGGCTTG  | 810bp         | 55              |
| MYRF Exon 12/13 rev     | GTAGGATTTCCAGGTGACAG  |               |                 |
| MYRF Exon 12 for        | AGGGACAGTTCAGTTGGGC   | 489bp         | 55              |
| MYRF Exon 12 rev        | TAGATCGGGATTTCGAGGCCA |               |                 |
| MYRF Exon 13 for        | GCCTCGAATCCCGATCTAACC | 362bp         | 55              |
| MYRF Exon 13 rev        | AGTTCCGGGAGTCAAGAGGA  |               |                 |
| MYRF Exon 14 for        | ATCCTGTGAACACTGGTTCCG | 462bp         | 55              |
| MYRF Exon 14 rev        | ATCTCCTTGAACACTCACCC  |               |                 |
| MYRF Exon 15/16 for     | TGACATCTGAGACACCAGTC  | 800bp         | 55              |
| MYRF Exon 15/16 rev     | AAGAAAGAGAAAACGGGGCTG |               |                 |
| MYRF Exon 17/18 for     | CTTTCTGGCTTGCGATTCTC  | 1033bp        | 55              |
| MYRF Exon 17/18 rev     | AGAAGACACAGTCAGAGGTGG |               |                 |
| MYRF Exon 17 for        | CCAGCCCCGTTTCTTTTCT   | 481bp         | 55              |
| MYRF Exon 17 rev        | TCCAGTGCCCTCTCTTAGG   |               |                 |
| MYRF Exon 18 for        | CTCAGGAGCAAGGACCACAG  | 236bp         | 55              |
| MYRF Exon 18 rev        | CTCATGGCTCTCTGACCTGG  |               |                 |
| MYRF Exon 19/22 for     | CTGTCTGGCCTGTTTAGTGC  | 1440bp        | 55              |
| MYRF Exon 19/22 rev     | ACTGACAAGTCTGAACCCAG  |               |                 |
| MYRF Exon 21/22 for seq | CATACAGCCCTCTTTGCTGC  |               |                 |
| MYRF Exon 19/20 rev seq | AACATGGCCAGGGTTAAAGC  |               |                 |
| MYRF Exon 19/20 for     | GGGTTGGAACATGGGGTAGG  | 573bp         | 57              |
| MYRF Exon 19/20 rev     | CCAGAGGCTGTATGAGCCAG  |               |                 |
| MYRF Exon 21 for        | GGGGCTTCTCTGGCTCATA   | 459bp         | 55              |
| MYRF Exon 21 rev        | AGGCACAGGCTAAGAAGCTG  |               |                 |
| MYRF Exon 22 for        | GGACCAAGAGACACATGGGG  | 515bp         | 55              |
| MYRF Exon 22 rev        | CTGCAGGCCTGATTCTGAT   |               |                 |
| MYRF Exon 23/25 for     | AAGGTGTGAGTGACTGCTTC  | 1083bp        | 55              |
| MYRF Exon 23/25 rev     | CTATAACTCCCAGCTTCTGC  |               |                 |
| MYRF Exon 24/25 for seq | CTTGGACACTGTCTCTTCTG  |               |                 |
| MYRF Exon 23 rev seq    | CAGAAGAGACAGTGCCAAG   |               |                 |
| MYRF Exon 23/24 for     | CCTTACTCTGCCCAACAG    | 623bp         | 55              |
| MYRF Exon 23/24 rev     | GGCCAGGTCATTTAGCCAGT  |               |                 |
| MYRF Exon 25 for        | CAGGCTGGGTGGAGATTGAG  | 412bp         | 55              |
| MYRF Exon 25 rev        | TGCTCAGCAGAGTGCAATGA  |               |                 |
| MYRF Exon 26/27 for     | GAACATGCTCCTTCTATCTC  | 579bp         | 55              |
| MYRF Exon 26/27 rev     | CTCCAGTGTAACACCATTGC  |               |                 |

\* PCR Conditions: 95°C 10 min, 35 cycles: 95°C 30sec, Annealing Temp 30 sec, 72° C 1 min; 72°C 10 min
