# Supplementary material for: Variants in myelin regulatory factor (MYRF) cause autosomal dominant and syndromic nanophthalmos in humans and retinal degeneration in mice
Source: PubMed Central journal article supplement (PMC6527243; doi:10.1371/journal.pgen.1008130), 2019-05-02
Supplement: pgen.1008130.s018.pdf [file pgen.1008130.s018.pdf]

Table S7. Other primers and PCR conditions used in this study.

| Experiment                      | Oligo Sequence                             | Amplicon Size            | Annealing Temp |
|---------------------------------|--------------------------------------------|--------------------------|----------------|
| PPP1R32 exon 6<br>(rs148713373) | for 5'-CTTCCCATCTTCCAATCCAC-3'             | 623bp                    | 55°C           |
|                                 | rev 5'-GCAGTGGTTTTACCTAAGC-3'              |                          |                |
| ZP1 exon 3<br>(rs145707301)     | for 5'-GAACCAGAAAGGAGCCAAAG-3'             | 642bp                    | 55°C           |
|                                 | rev 5'-GCCCAGTAAAAGGCTGTTAG-3'             |                          |                |
| MYRF mini-gene cloning          | for 5'-ATATATATCGATCATCCTGTCCCTCCGTGAAT-3' | 2903bp                   | 55°C           |
|                                 | rev 5'-ATATATCTCGAGTCCACTCCTAGCCCCAAT-3'   |                          |                |
| MYRF splicing evaluation        | for 5'-CATCCTGTCCTTCCGTGAAT-3'             | 698 genomic, 510 spliced | 55°C           |
|                                 | rev 5'-GTCTCAAAGGGGAGGCAAG-3'              |                          |                |
| <i>Rxcre</i> mouse genotyping   | for 5'-GCCTGCCCTCCCTGTGGATGCCACCT-3'       | 357bp                    | 60°C           |
|                                 | rev 5'-GCCAGGGCCTGCTTGGCTCTCTCCCC-3'       |                          |                |
| <i>Myrf</i> floxed genotyping   | for 5'-AGGAGTGTGGGAAGTGG-3'                | wt-281bp, flox 489bp     | 60°C           |
|                                 | rev 5'-CCCAGGCTGAAGATGGAATA-3'             |                          |                |

wt, wild-type MYRF allele; flox, MYRF floxed allele
