# Supplementary material for: Variants in myelin regulatory factor (MYRF) cause autosomal dominant and syndromic nanophthalmos in humans and retinal degeneration in mice
Source: PLoS Genet. 2019 May 2;15(5):e1008130. doi: 10.1371/journal.pgen.1008130 (PMC6527243; doi:10.1371/journal.pgen.1008130)
Supplement: S1 Data — (XLSX) [file pgen.1008130.s019.xlsx]

## Sheet: Figure5A Data
	MYRF		GAPDH		dCt		2^-dCt		relative
	Avg	Std Dev	Avg	Std dev	Avg	Std dev	Avg	Std dev	Avg	Std dev
Cornea	34.1667	0.110151	22.73	0.127671	11.4367	0.168622	0.000360762	4.22948e-05	0.0462843	0.00542626
TM	30.07	0.043589	22.54	0.243311	7.53	0.247184	0.00541058	0.00092986	0.694157	0.119297
Iris	29.65	0.052915	22.41	0.175214	7.24	0.18303	0.0066152	0.000841817	0.848704	0.108002
CB	29.9367	0.147422	22.6167	0.0723418	7.32	0.164215	0.00625836	0.00071454	0.802923	0.0916727
RPE/Chor	29.5	0.072111	24.4233	0.0907377	5.07667	0.115902	0.0296327	0.0023879	3.80176	0.306358
Retina	31.19	0.144222	21.6733	0.0251661	9.51667	0.146401	0.00136521	0.000138962	0.17515	0.0178283
Sclera	33	0.160935	25.72	0.150997	7.28	0.220681	0.0064343	0.000987231	0.825496	0.126658
PPS	34.1167	0.243379	26.5067	0.291605	7.61	0.379825	0.00511872	0.00135175	0.656712	0.173425
ONH	30.9133	0.0251661	26.06	0.191572	4.85333	0.193218	0.034594	0.00464732	4.43828	0.596232
PLON	26.1033	0.0776745	25.1267	0.132791	0.976667	0.15384	0.508152	0.054352	65.194	6.97314
ONS	35.4133	0.390043	27.6367	0.161658	7.77667	0.422216	0.00456026	0.00133868	0.585064	0.171748
Muscle	34.4833	0.348186	27.48	0.190788	7.00333	0.397031	0.00779447	0.00215161	1	0.276043
Fat	33.8267	0.238607	26.2167	0.170392	7.61	0.293201	0.00511872	0.00104347	0.656712	0.133873
Blood	36.0633	0.180093	24.7067	0.25482	11.3567	0.312036	0.000381332	8.27295e-05	0.0489233	0.0106139
